# Supplementary material for: Successive redox modulation in an iron(ii) spin-crossover framework
Source: Royal Society of Chemistry journal article supplement (doi:10.1039/d3qi00644a), 2023-01-01
Supplement: d3qi00644a1.pdf [file d3qi00644a1.pdf]

## Supporting Information

### **Successive redox modulation in an iron(II) spin-crossover framework**

Bang-Heng Lyu,<sup>a</sup> Ze-Yu Ruan,<sup>a</sup> Wen Cui,<sup>a</sup> Si-Guo Wu,<sup>a\*</sup> Zhao-Ping Ni<sup>a\*</sup>  
and Ming-Liang Tong<sup>a\*</sup>

Key Laboratory of Bioinorganic and Synthetic Chemistry of Ministry of Education,  
School of Chemistry, Sun Yat-Sen University, Guangzhou, 510275, P. R. China

## Contents

|                                 |    |
|---------------------------------|----|
| Thermogravimetric analysis..... | 3  |
| Crystal data.....               | 5  |
| Powder X-Ray Diffraction .....  | 10 |
| Infrared spectra.....           | 12 |
| XPS Measurements .....          | 15 |
| Magnetization measurements..... | 19 |

## Thermogravimetric analysis

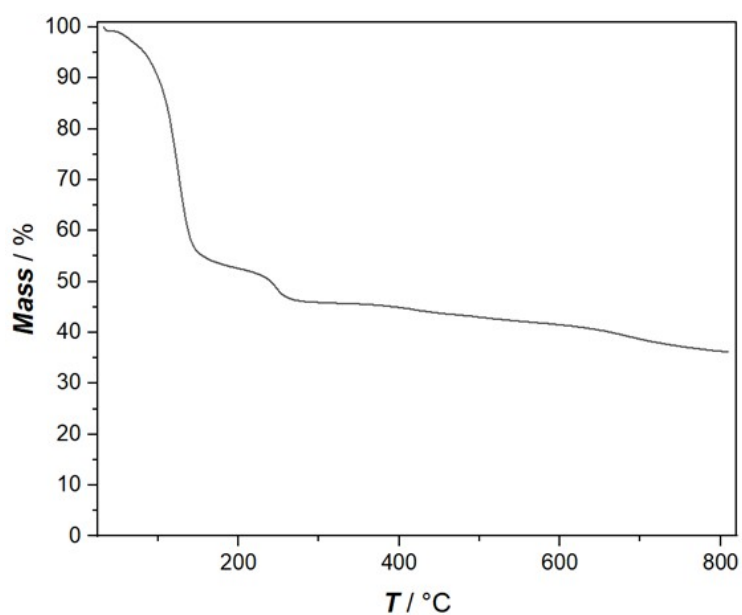

**Figure S1.** Thermogravimetric analysis curve of **1**. The weight loss of 53.4% is close to the theoretical value of 53.0% corresponding to the escape of 2 H<sub>2</sub>O and 7 TCE molecules.

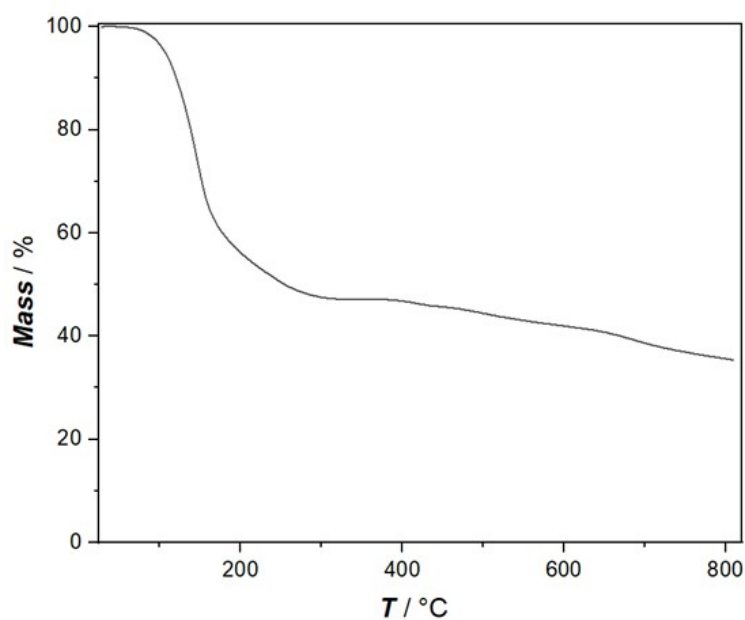

**Figure S2.** Thermogravimetric analysis curve of **2**. The weight loss of 52.6% is close to the theoretical value of 51.9% corresponding to the escape of 1 I<sub>2</sub> and 7 TCE molecules.

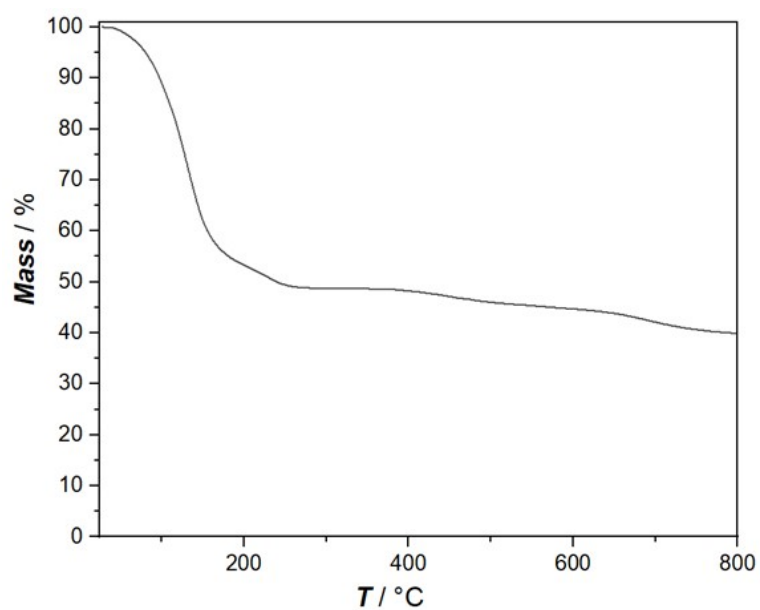

**Figure S3.** Thermogravimetric analysis curve of **3**. The weight loss of 51.1% is close to the theoretical value of 50.3% corresponding to the escape of 1 H<sub>2</sub>O and 8 TCE molecules.

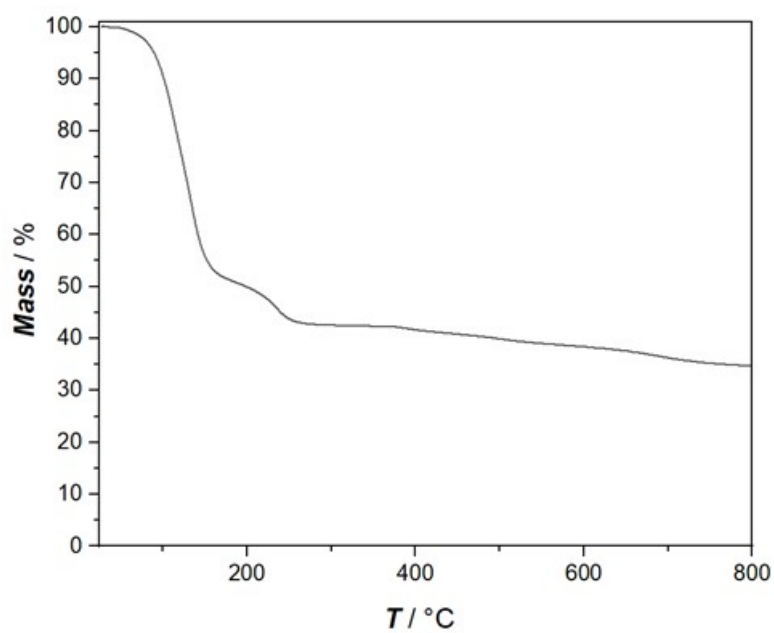

**Figure S4.** Thermogravimetric analysis curve of **4**. The weight loss of 57.2% is close to the theoretical value of 57.7% corresponding to the escape of 3 H<sub>2</sub>O and 8 TCE molecules.

## Crystal data

**Table S1.** Crystallographic data for **1**.

|                                              |                                   |                                   |
|----------------------------------------------|-----------------------------------|-----------------------------------|
| Empirical formula                            | $C_{62}H_{50}AuCl_{28}O_2FeIN_6$  |                                   |
| Formula weight                               | 2283.39                           |                                   |
| Temperature/K                                | 300.00                            | 120.00                            |
| Crystal system                               | orthorhombic                      | orthorhombic                      |
| Space group                                  | <i>Pmmm</i>                       | <i>Pmmm</i>                       |
| $a / \text{Å}$                               | 10.5117(10)                       | 10.0549(7)                        |
| $b / \text{Å}$                               | 14.7107(14)                       | 14.5520(10)                       |
| $c / \text{Å}$                               | 16.9860(17)                       | 16.5361(12)                       |
| $\alpha / ^\circ$                            | 90                                | 90                                |
| $\beta / ^\circ$                             | 90                                | 90                                |
| $\gamma / ^\circ$                            | 90                                | 90                                |
| Volume / $\text{Å}^3$                        | 2626.6(4)                         | 2419.5(3)                         |
| $Z$                                          | 1                                 | 1                                 |
| $\rho_{\text{calc}} / \text{g/cm}^3$         | 1.444                             | 1.567                             |
| $\mu / \text{mm}^{-1}$                       | 2.575                             | 2.795                             |
| $F(000)$                                     | 1114.0                            | 1114.0                            |
| Crystal size / $\text{mm}^3$                 | $0.226 \times 0.215 \times 0.205$ | $0.226 \times 0.215 \times 0.205$ |
| Reflections collected                        | 24957                             | 36892                             |
| Independent reflections                      | 3532                              | 3383                              |
| Goodness-of-fit on $F^2$                     | 1.081                             | 1.185                             |
| Final $R$ indexes [ $I \geq 2\sigma(I)$ ]    | $R_1 = 0.0829, wR_2 = 0.2287$     | $R_1 = 0.0519, wR_2 = 0.1533$     |
| Final $R$ indexes [all data]                 | $R_1 = 0.0882, wR_2 = 0.2337$     | $R_1 = 0.0539, wR_2 = 0.1556$     |
| Largest diff. peak/hole / $e \text{ Å}^{-3}$ | 3.57/−1.28                        | 2.52/−0.96                        |
| CCDC                                         | 2249183                           | 2249182                           |

$${}^a R_1 = \frac{\sum |F_o| - |F_c|}{\sum |F_o|}; {}^b wR_2 = \left\{ \frac{\sum w(F_o^2 - F_c^2)^2}{\sum [w(F_o^2)^2]} \right\}^{1/2}$$

**Table S2.** Crystallographic data for **2**.

|                                                      |                                                                 |                                                                 |
|------------------------------------------------------|-----------------------------------------------------------------|-----------------------------------------------------------------|
| Empirical formula                                    | $C_{62}H_{46}AuCl_{28}FeI_5N_6$                                 |                                                                 |
| Formula weight                                       | 2754.96                                                         |                                                                 |
| Temperature/K                                        | 320.0                                                           | 102.00                                                          |
| Crystal system                                       | orthorhombic                                                    | orthorhombic                                                    |
| Space group                                          | <i>Pmmm</i>                                                     | <i>Fmmm</i>                                                     |
| <i>a</i> / Å                                         | 10.4944(9)                                                      | 19.9965(11)                                                     |
| <i>b</i> / Å                                         | 14.6760(13)                                                     | 28.2630(17)                                                     |
| <i>c</i> / Å                                         | 17.0345(15)                                                     | 33.579(2)                                                       |
| <i>α</i> / °                                         | 90                                                              | 90                                                              |
| <i>β</i> / °                                         | 90                                                              | 90                                                              |
| <i>γ</i> / °                                         | 90                                                              | 90                                                              |
| Volume / Å <sup>3</sup>                              | 2623.6(4)                                                       | 18977.4(19)                                                     |
| <i>Z</i>                                             | 1                                                               | 8                                                               |
| $\rho_{\text{calc}}$ g/cm <sup>3</sup>               | 1.744                                                           | 1.928                                                           |
| $\mu$ /mm <sup>-1</sup>                              | 3.754                                                           | 4.152                                                           |
| <i>F</i> (000)                                       | 1306.0                                                          | 10448.0                                                         |
| Crystal size / mm <sup>3</sup>                       | 0.397 × 0.346 × 0.279                                           | 0.234 × 0.217 × 0.186                                           |
| Reflections collected                                | 23389                                                           | 44070                                                           |
| Independent reflections                              | 3085                                                            | 6286                                                            |
| Goodness-of-fit on <i>F</i> <sup>2</sup>             | 1.120                                                           | 1.066                                                           |
| Final <i>R</i> indexes [ <i>I</i> ≥ 2σ ( <i>I</i> )] | <i>R</i> <sub>1</sub> = 0.1028, <i>wR</i> <sub>2</sub> = 0.2803 | <i>R</i> <sub>1</sub> = 0.0869, <i>wR</i> <sub>2</sub> = 0.2724 |
| Final <i>R</i> indexes [all data]                    | <i>R</i> <sub>1</sub> = 0.1059, <i>wR</i> <sub>2</sub> = 0.2843 | <i>R</i> <sub>1</sub> = 0.1082, <i>wR</i> <sub>2</sub> = 0.2919 |
| Largest diff. peak/hole / e Å <sup>-3</sup>          | 3.75/−2.17                                                      | 2.85/−3.67                                                      |
| CCDC                                                 | 2249191                                                         | 2249190                                                         |

$${}^a R_1 = \frac{\sum |F_o| - |F_c|}{\sum |F_o|}; {}^b wR_2 = \left\{ \frac{[\sum w(F_o^2 - F_c^2)^2]}{\sum [w(F_o^2)^2]} \right\}^{1/2}$$

**Table S3.** Crystallographic data for **3**.

|                                                     |                                                                                      |
|-----------------------------------------------------|--------------------------------------------------------------------------------------|
| Empirical formula                                   | C <sub>64</sub> H <sub>50</sub> AuCl <sub>32</sub> OBr <sub>5</sub> FeN <sub>6</sub> |
| Formula weight                                      | 2705.86                                                                              |
| Temperature/K                                       | 120.0                                                                                |
| Crystal system                                      | orthorhombic                                                                         |
| Space group                                         | <i>Pmmm</i>                                                                          |
| <i>a</i> / Å                                        | 10.006(3)                                                                            |
| <i>b</i> / Å                                        | 14.398(5)                                                                            |
| <i>c</i> / Å                                        | 16.704(5)                                                                            |
| $\alpha$ / °                                        | 90                                                                                   |
| $\beta$ / °                                         | 90                                                                                   |
| $\gamma$ / °                                        | 90                                                                                   |
| Volume / Å <sup>3</sup>                             | 2406.5(13)                                                                           |
| <i>Z</i>                                            | 1                                                                                    |
| $\rho_{\text{calc}}$ g/cm <sup>3</sup>              | 1.867                                                                                |
| $\mu$ /mm <sup>-1</sup>                             | 4.679                                                                                |
| <i>F</i> (000)                                      | 1308.0                                                                               |
| Crystal size / mm <sup>3</sup>                      | 0.143 × 0.121 × 0.116                                                                |
| Reflections collected                               | 24481                                                                                |
| Independent reflections                             | 2257                                                                                 |
| Goodness-of-fit on <i>F</i> <sup>2</sup>            | 1.024                                                                                |
| Final <i>R</i> indexes [ <i>I</i> ≥ 2σ( <i>I</i> )] | <i>R</i> <sub>1</sub> = 0.0923, <i>wR</i> <sub>2</sub> = 0.2550                      |
| Final <i>R</i> indexes [all data]                   | <i>R</i> <sub>1</sub> = 0.1326, <i>wR</i> <sub>2</sub> = 0.2826                      |
| Largest diff. peak/hole / e Å <sup>-3</sup>         | 2.78/−1.21                                                                           |
| CCDC                                                | 2249194                                                                              |

$${}^a R_1 = \sum |F_o| - |F_c| / \sum |F_o|; {}^b wR_2 = \{[\sum w(F_o^2 - F_c^2)^2] / \sum [w(F_o^2)^2]\}^{1/2}$$

**Table S4.** Selected bond lengths for **1**

| T / K                   | 300       | 120      |
|-------------------------|-----------|----------|
| Fe1–N1 / Å              | 2.124(9)  | 1.906(6) |
| Fe1–N2 / Å              | 2.235(5)  | 2.002(3) |
| <Fe–N> <sup>a</sup> / Å | 2.198     | 1.970    |
| ΣFe <sup>b</sup> / °    | 4.78      | 4.19     |
| Au1–C1                  | 1.958(10) | 1.964(7) |
| ∠Fe1–N1–C1 / °          | 180       | 180      |
| ∠Au1–C1–N1 / °          | 180       | 180      |

<sup>a</sup>average Fe–N bond length; <sup>b</sup>Octahedral distortion parameters.

**Table S5.** Selected bond lengths for **2**

| T / K                   | 320       | 102       |
|-------------------------|-----------|-----------|
| Fe1–N1 / Å              | 2.143(13) | 1.892(10) |
| Fe1–N2 / Å              | 2.227(9)  | 1.997(6)  |
| <Fe–N> <sup>a</sup> / Å | 2.199     | 1.962     |
| ΣFe <sup>b</sup> / °    | 3.58      | 14.5      |
| Au1–C1                  | 1.949(14) | 1.943(12) |
| Au1–I1                  | 2.699(11) | 2.617(3)  |
| Au1–I1A                 | 2.658(14) | 2.607(5)  |
| Au1–I1B                 | -         | 2.586(9)  |
| ∠Fe1–N1–C1 / °          | 180       | 180       |
| ∠Au1–C1–N1 / °          | 180       | 180       |

<sup>a</sup>average Fe–N bond length; <sup>b</sup>Octahedral distortion parameters.



**Table S6.** Selected bond lengths for **3**

| T / K                   | 120       |
|-------------------------|-----------|
| Fe1–N1 / Å              | 1.86(2)   |
| Fe1–N2 / Å              | 2.055(12) |
| <Fe–N> <sup>a</sup> / Å | 1.990     |
| ΣFe <sup>b</sup> / °    | 10.6      |
| Au1–C1                  | 1.96(3)   |
| Au1–Br1                 | 2.405(9)  |
| Au1–Br2                 | 2.405(13) |
| Au1–Br2A                | 2.394(12) |
| ∠Fe1–N1–C1 / °          | 180       |
| ∠Au1–C1–N1 / °          | 180       |

<sup>a</sup>average Fe–N bond length; <sup>b</sup>Octahedral distortion parameters.

## Powder X-Ray Diffraction

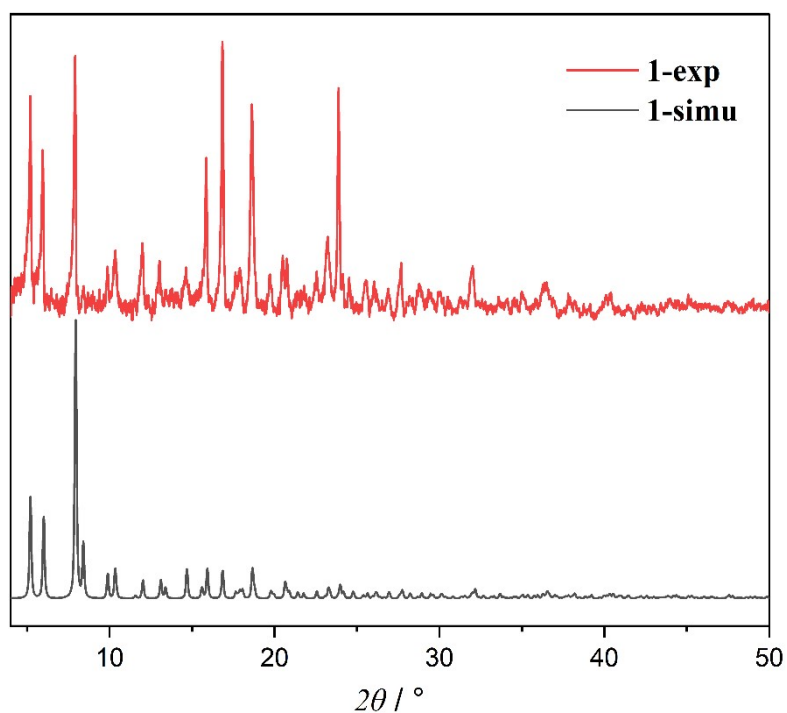

**Figure S5.** Powder X-ray diffraction (PXRD) patterns for **1**. The simulated PXRD pattern was obtained from crystal data at 300 K.

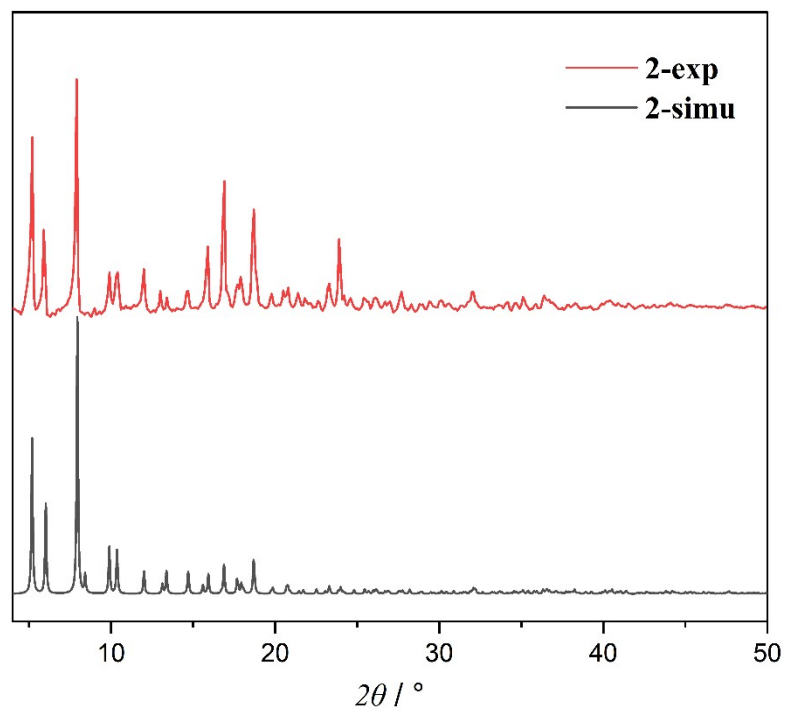

**Figure S6.** Powder X-ray diffraction (PXRD) patterns for **2**. The simulated PXRD pattern was obtained from crystal data at 320 K.

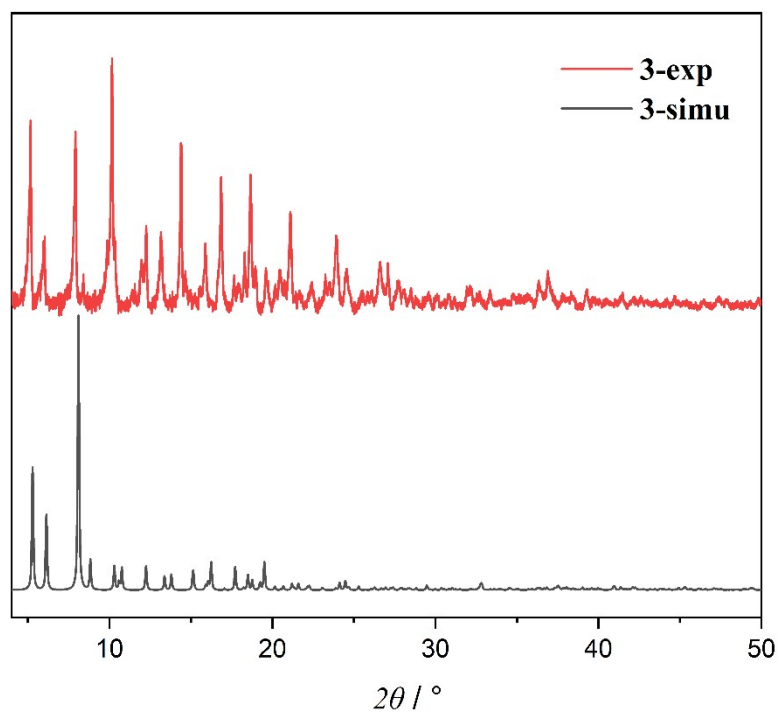

**Figure S7.** Powder X-ray diffraction (PXRD) patterns for **3**. The simulated PXRD pattern was obtained from crystal data at 120 K.

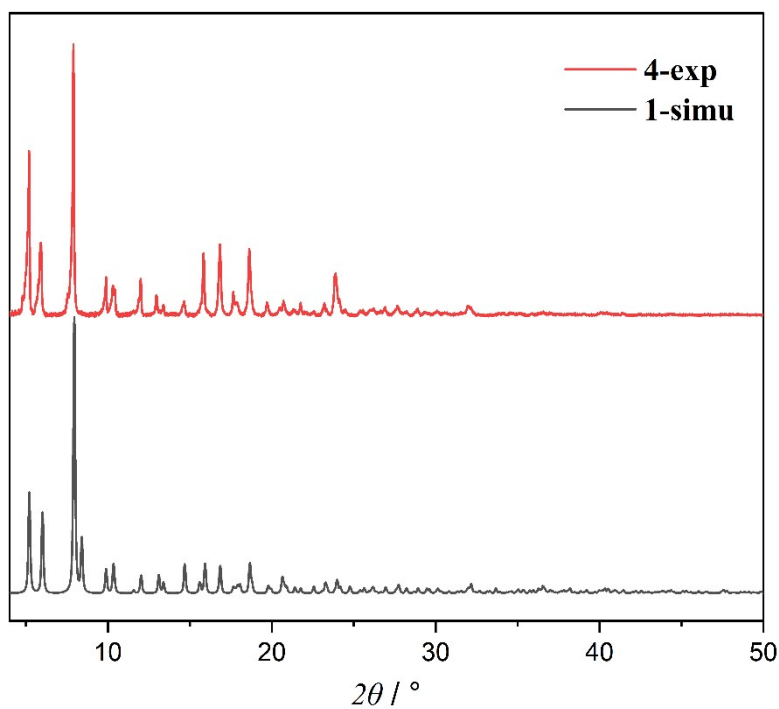

**Figure S8.** Powder X-ray diffraction (PXRD) patterns for **4**. The simulated PXRD pattern was obtained from crystal data of **1** at 300 K.

## Infrared spectra

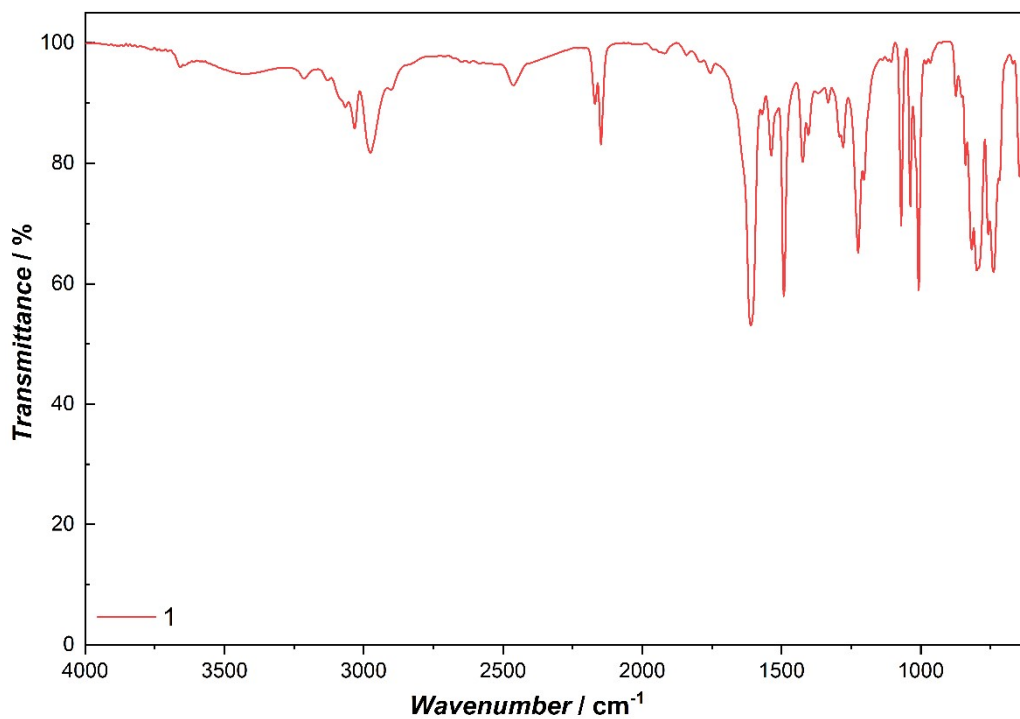

Figure S9. The infrared spectrum of **1**.

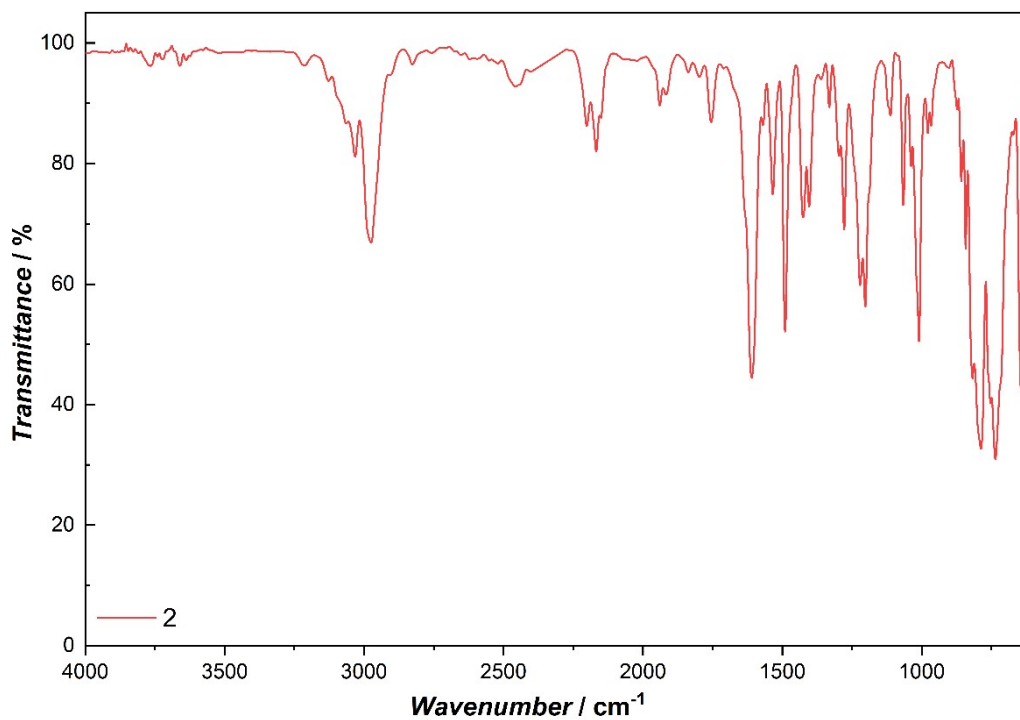

Figure S10. The infrared spectrum of **2**.

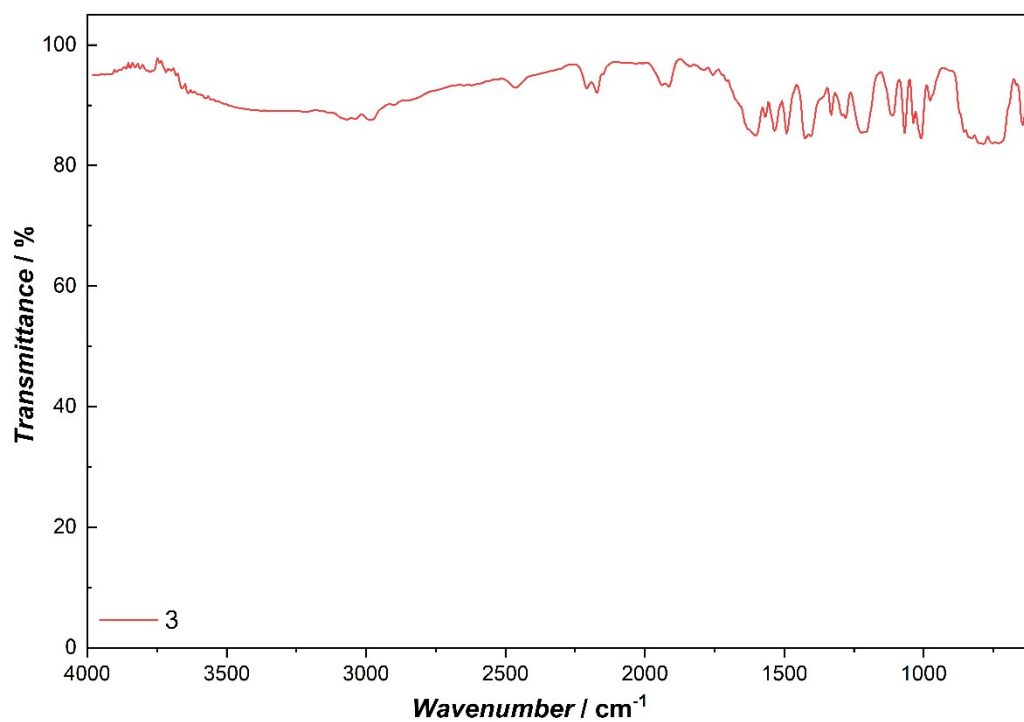

**Figure S11.** The infrared spectrum of **3**.

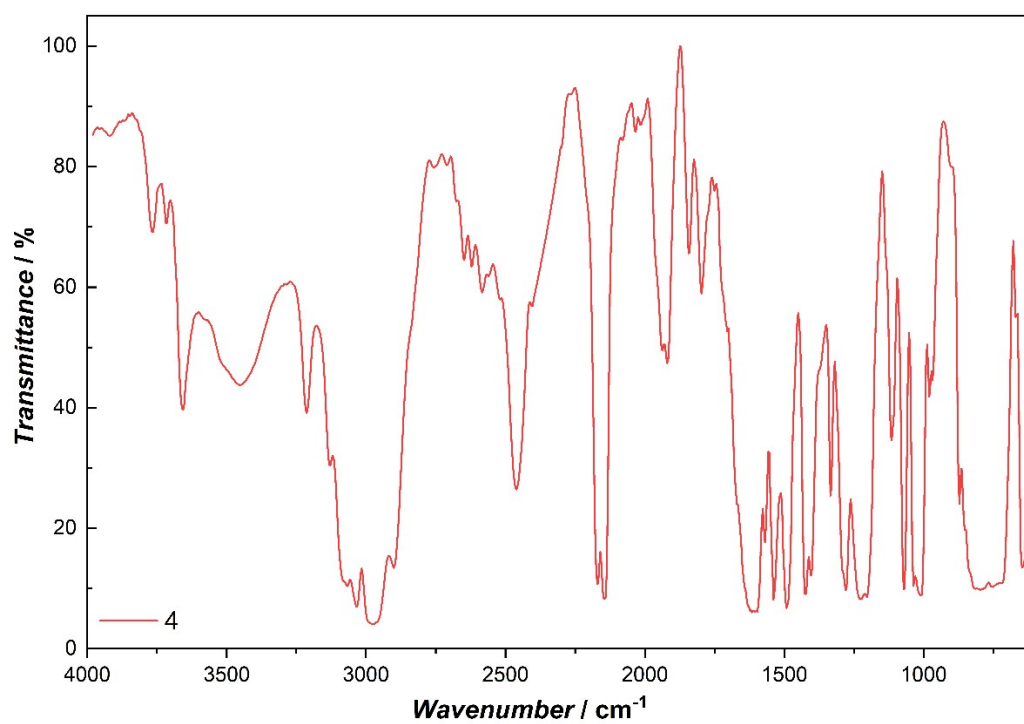

**Figure S12.** The infrared spectrum of **4**.

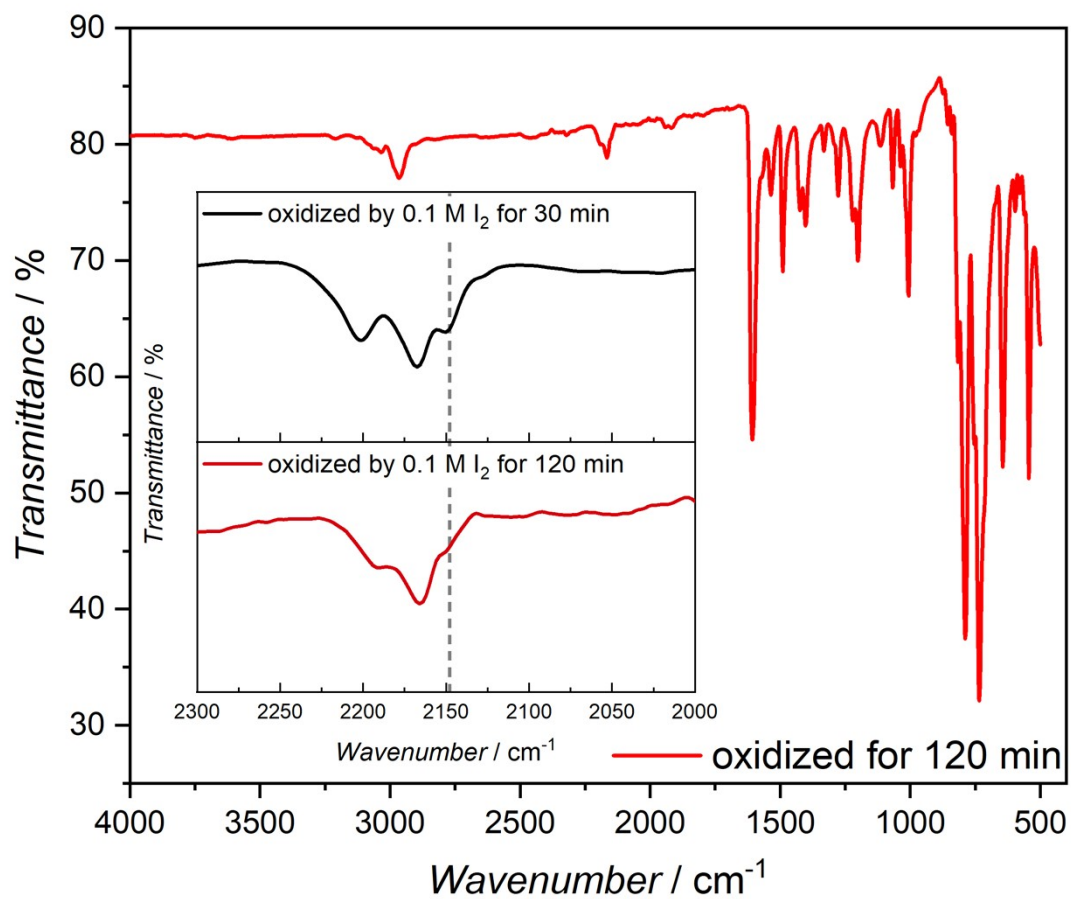

**Figure S13.** The infrared spectrum of the oxidation product obtained by reacting **1** with 0.1 M I<sub>2</sub> for 120 min. Inset: the enlarged view of the cyanide vibration signals for the products after being oxidized by 0.1 M I<sub>2</sub> for 30 and 120 min.

## XPS Measurements

X-ray photoelectron spectroscopy (XPS) measurements were carried out with the Thermo Fisher Scientific ESCALAB Xi+ system ( $Al-K_{\alpha}$  source). Sequential XPS spectra were recorded by scanning the electron analyzer from 100 to 75 eV (increment: 0.05 V, pass energy: 20.0 eV). The total acquisition times for Au 4f scan were about 3.5 min for **1**, about 0.5 min for **2** and **3** and about 1 min for **4**. The peak analysis processes were carried out with the XPSPEAK41 package. The electron-scattering background was deducted using a Shirley method without changing the intrinsic profile of raw data. The intervals and area ratios of  $4f_{7/2}$  and  $4f_{5/2}$  were restricted to 3.67 eV and 4:3 according to the literature. The full-width-at-half-maximum of the  $4f_{7/2}$  and  $4f_{5/2}$  doublets was fitted equally. The best fitted results were obtained by using a pseudo-Voigt function (20% Gaussian and 80% Lorentzian).

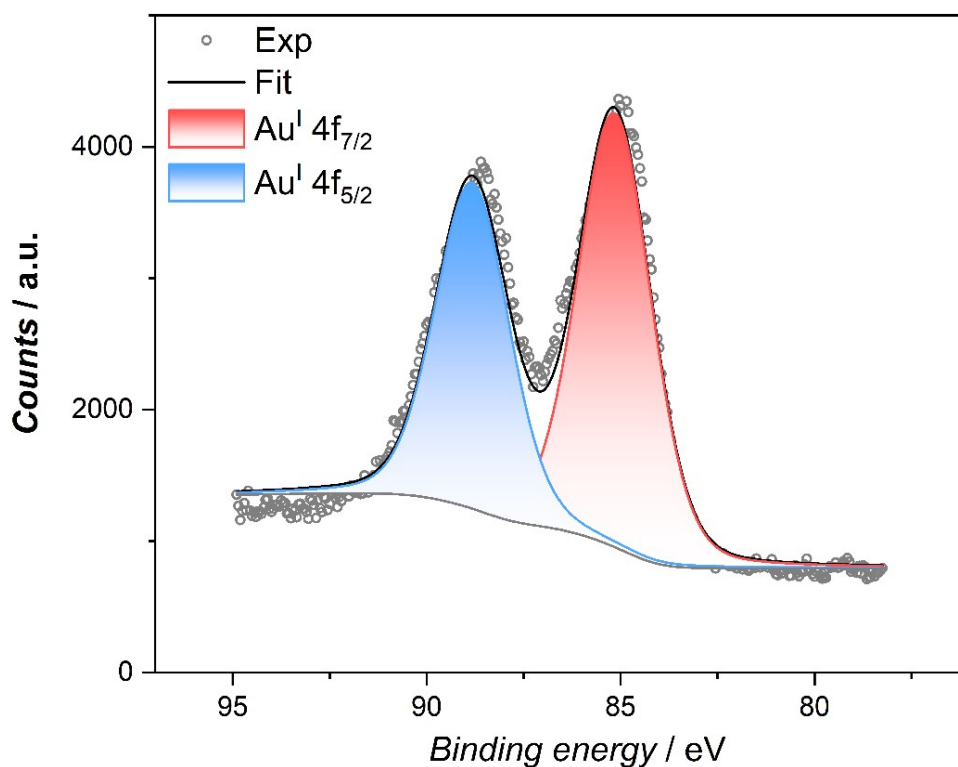

**Figure S14.** X-ray photoelectron spectroscopy of Au 4f in **1**.

**Table S7.** The parameters of best fit results of Au 4f in **1**.

| Peak                              | Position / eV | Area     | FWHM / eV |
|-----------------------------------|---------------|----------|-----------|
| Au <sup>I</sup> 4f <sub>7/2</sub> | 85.154        | 8634.142 | 2.243     |
| Au <sup>I</sup> 4f <sub>5/2</sub> | 88.824        | 6475.606 | 2.243     |

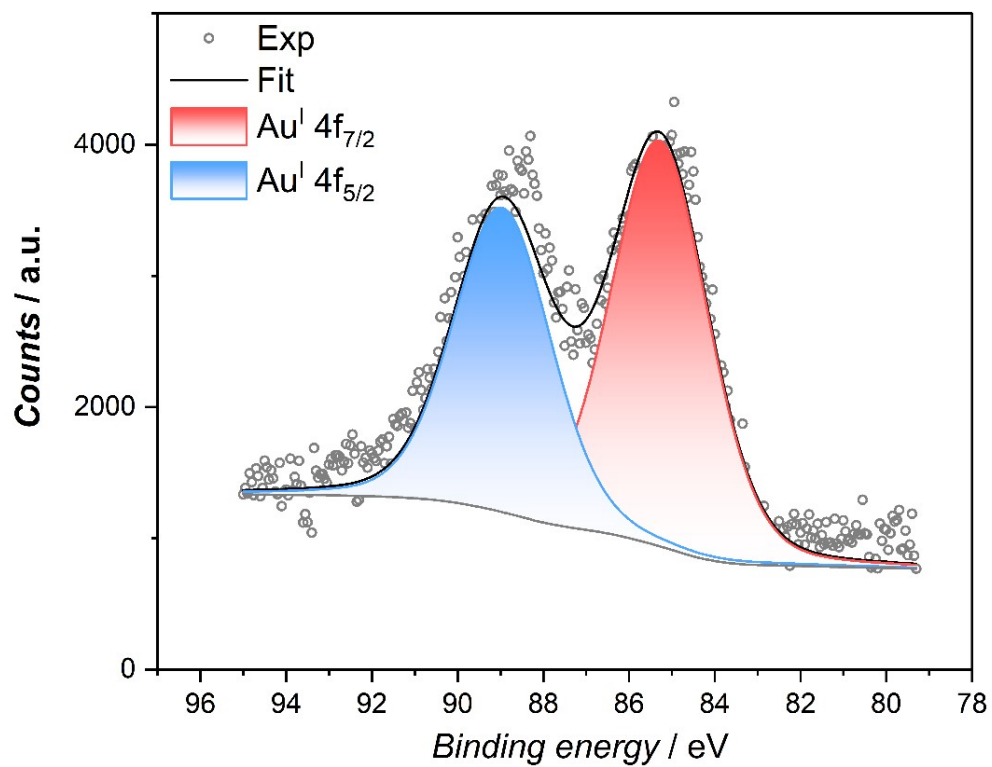

**Figure S15.** X-ray photoelectron spectroscopy of Au 4f in **2**.

**Table S8.** The parameters of best fit results of Au 4f in **2**.

| Peak                              | Position / eV | Area     | FWHM / eV |
|-----------------------------------|---------------|----------|-----------|
| Au <sup>I</sup> 4f <sub>7/2</sub> | 85.287        | 9663.406 | 2.680     |
| Au <sup>I</sup> 4f <sub>5/2</sub> | 88.957        | 7247.555 | 2.680     |



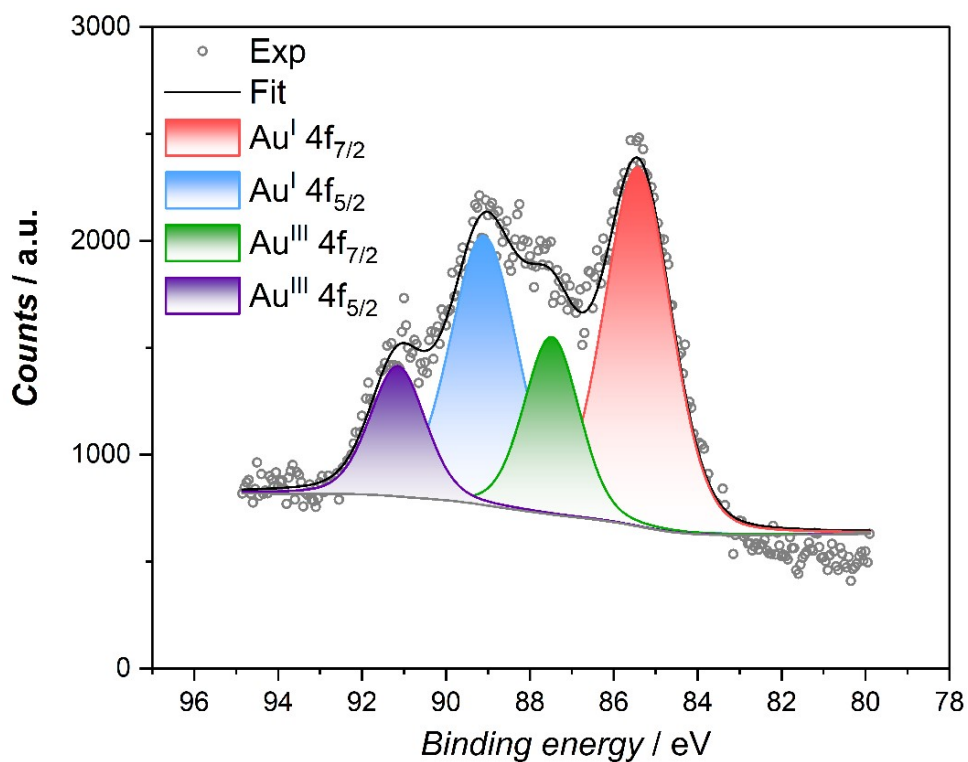

**Figure S16.** X-ray photoelectron spectroscopy of Au 4f in **3**.

**Table S9.** The parameters of best fit results of Au 4f in **3**.

| Peak                                | Position / eV | Area     | FWHM / eV |
|-------------------------------------|---------------|----------|-----------|
| Au <sup>I</sup> 4f <sub>7/2</sub>   | 85.427        | 3694.506 | 1.887     |
| Au <sup>I</sup> 4f <sub>5/2</sub>   | 89.097        | 2770.879 | 1.887     |
| Au <sup>III</sup> 4f <sub>7/2</sub> | 87.479        | 1510.974 | 1.560     |
| Au <sup>III</sup> 4f <sub>5/2</sub> | 91.149        | 1133.231 | 1.560     |

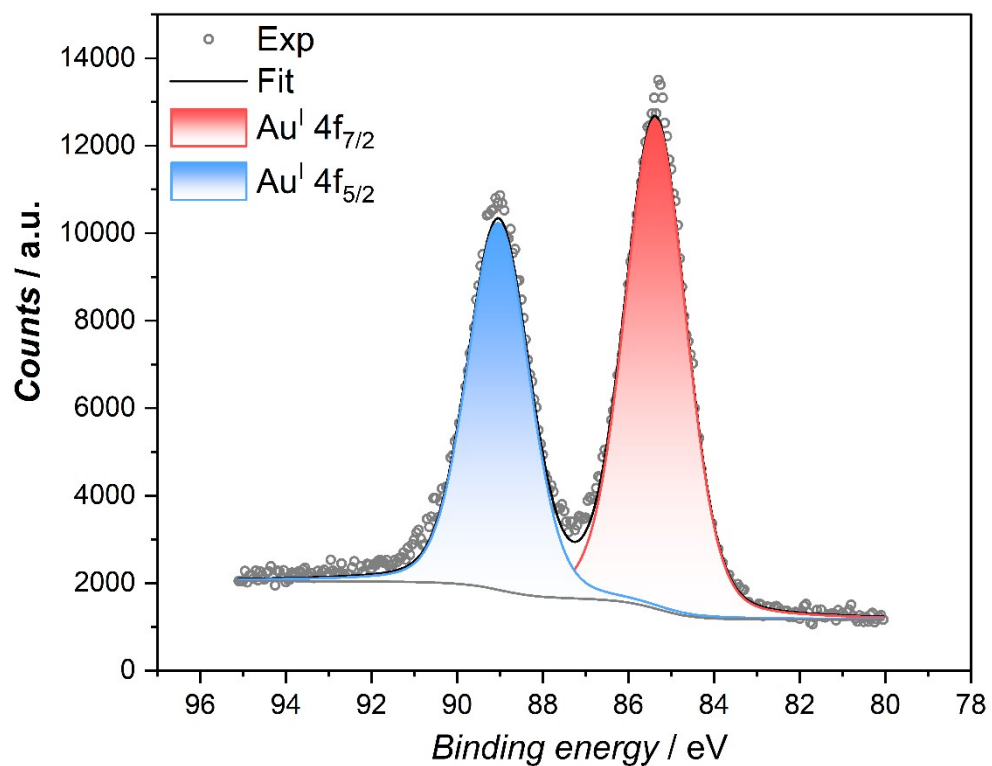

**Figure S17.** X-ray photoelectron spectroscopy of Au 4f in **4**.

**Table S10.** The parameters of best fit results of Au 4f in **4**.

| Peak                              | Position / eV | Area     | FWHM / eV |
|-----------------------------------|---------------|----------|-----------|
| Au <sup>I</sup> 4f <sub>7/2</sub> | 85.368        | 22125.31 | 1.697     |
| Au <sup>I</sup> 4f <sub>5/2</sub> | 89.038        | 16593.98 | 1.697     |

## Magnetization measurements

Magnetic susceptibility measurements were performed on a Quantum Design PPMS3 SQUID magnetometer with a sweep rate of  $2 \text{ K min}^{-1}$  under applied field of 5 kOe. Polycrystalline samples were packed in plastic film with a small amount of mother liquor. Data were corrected for the signal of the sample holder and diamagnetic contribution calculated from Pascal's constants.

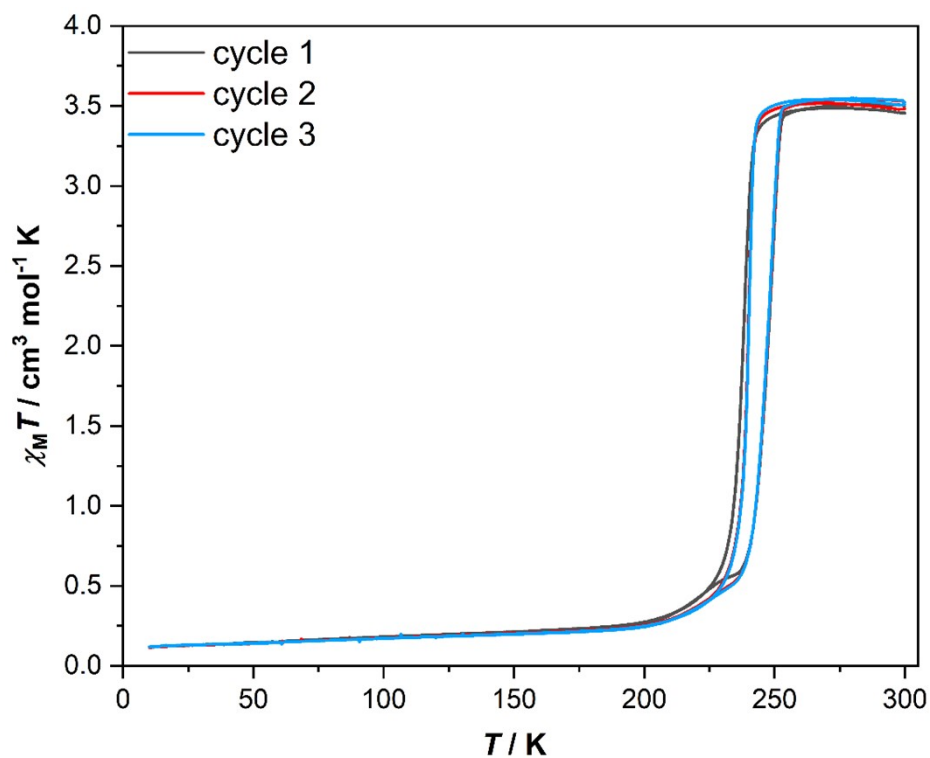

**Figure S18.** The temperature-dependent magnetic susceptibility data of **1** with a sweep rate of  $2 \text{ K min}^{-1}$ .

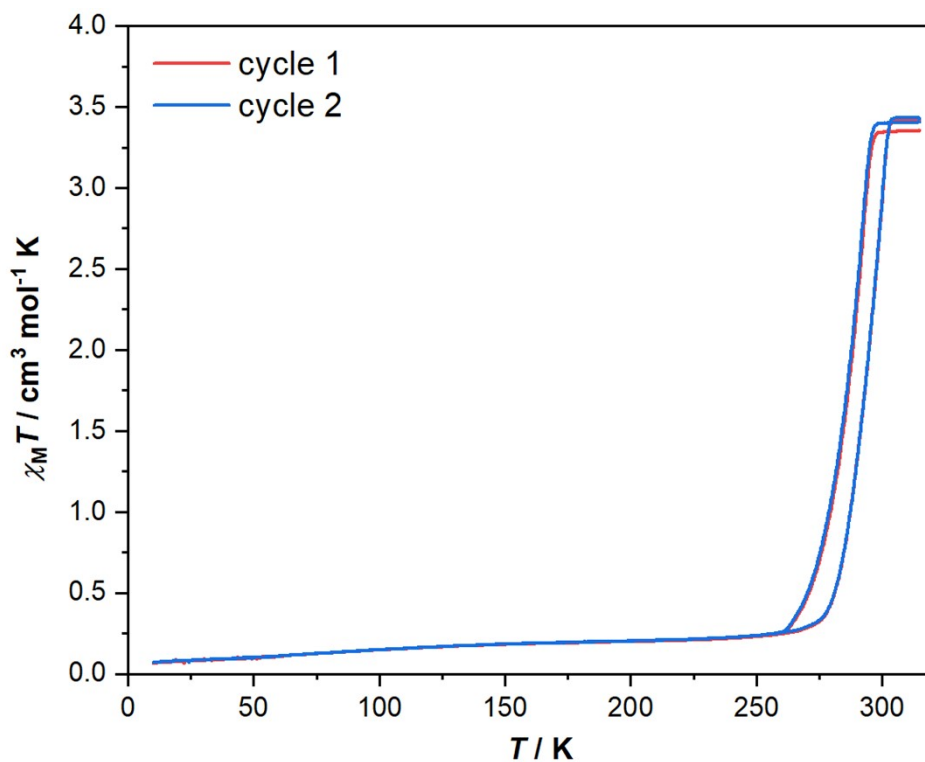

**Figure S19.** The temperature-dependent magnetic susceptibility data of **2** with a sweep rate of 2 K min<sup>-1</sup>.

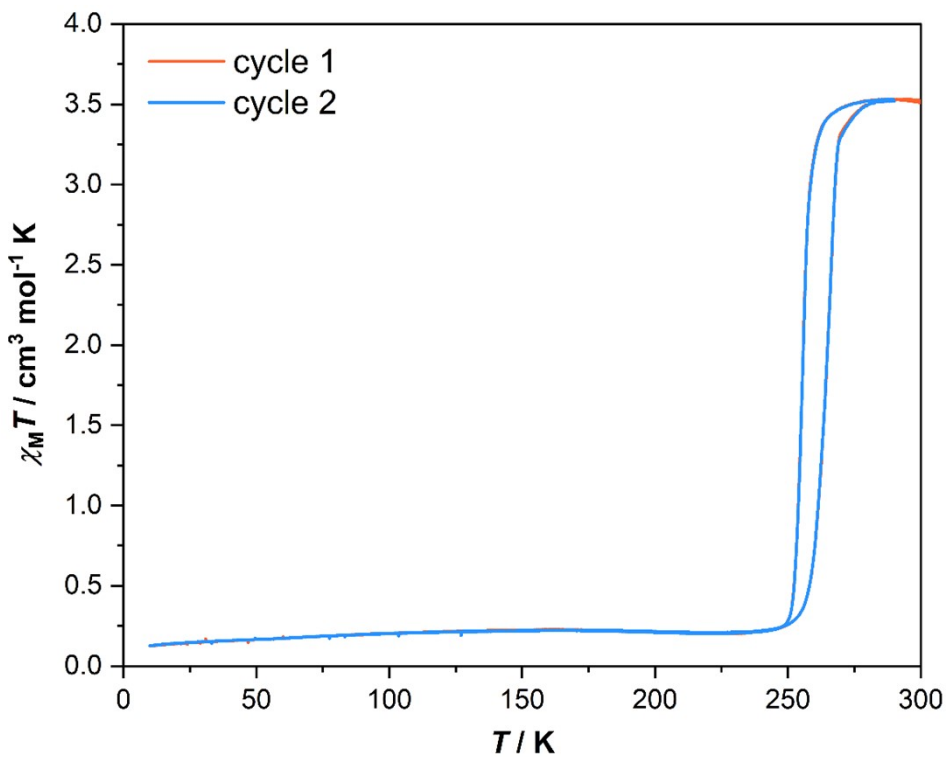

**Figure S20.** The temperature-dependent magnetic susceptibility data of **3** with a sweep rate of 2 K min<sup>-1</sup>.

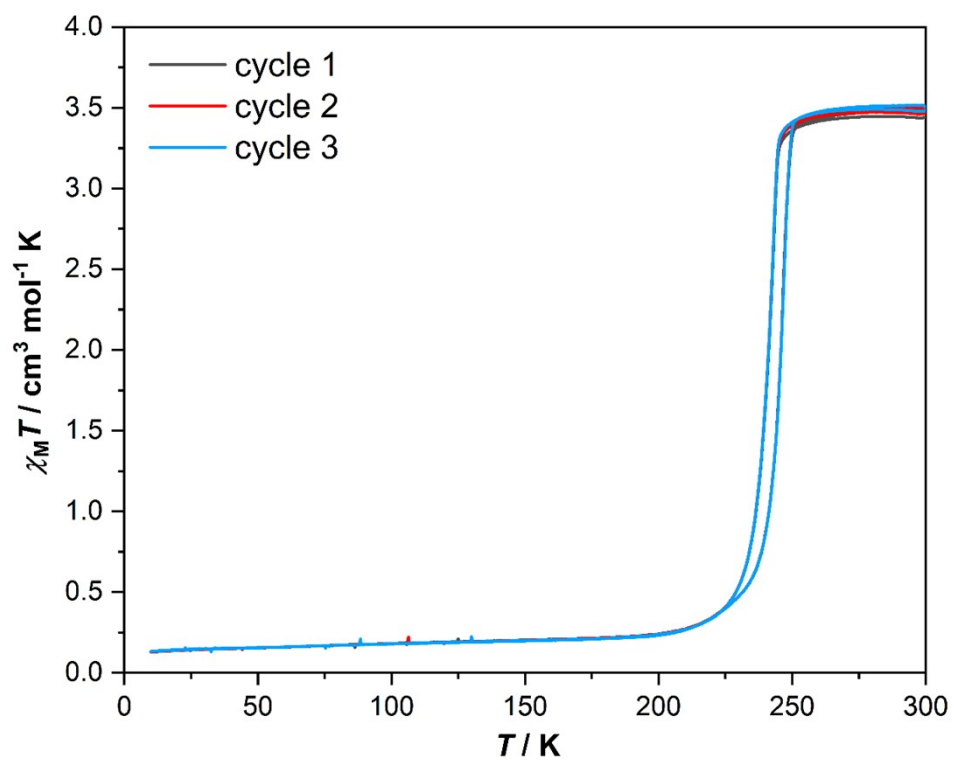

**Figure S21.** The temperature-dependent magnetic susceptibility data of **4** with a sweep rate of  $2 \text{ K min}^{-1}$ .
